# Supplementary material for: Hybridization and de-hybridization between the locally-excited (LE) state and the charge-transfer (CT) state: a combined experimental and theoretical study
Source: Royal Society of Chemistry journal article supplement (doi:10.1039/c6cp02778d), 2016-01-01
Supplement: c6cp02778d1.pdf [file c6cp02778d1.pdf]

## Supporting Information

### **Hybridization and De-hybridization between Locally-excited (LE) state and Charge-transfer (CT) state: A Combined Experimental and Theoretical Study**

*Yu Gao, Shitong Zhang, Yuyu Pan, Liang Yao, Haichao Liu, Yacheng Guo, Qiang Gu,  
Bing Yang\* and Yuguang Ma*

### **Contents**

**SI-1: Functional Selection**

**SI-2: Computational methodology**

**SI-3: Optimized geometry and UV wavelengths**

**SI-4: NTOs and Centroids of charges of S1 and S2 states of cyano-substituent  
molecules compared with NTOs of S1 of cyano-free molecules**

**SI-5: The excitation energy diagram of S1-S5 states of all the molecules**

**SI-6: Transition density matrix color-filled map and contents of LE and CT of S1  
and S2 states of cyano-substituent molecules**

## SI-1: Functional Selection

Three DFT functional (B3lyp, M062x and  $\omega$ b97xd) are used to choose the most suitable functional. B3lyp, which has a well-known problem, is obviously underestimated CT state energy. Compared the simulation data with the emitting wavelengths of TPMCN and TPBMCN, M062x is the closest to the Experimental data. So we choose M062x for the following calculation. The NTOs and emitting wavelengths of H<sub>1</sub>V<sub>2</sub> in acetonitrile were calculated by using the polarizable continuum model (PCM) under M062x functional and 6-31G(d,p) basis set.

Table S1 Emitting wavelengths of TPMCN and TPBMCN in Experiment and various TD-DFT(B3lyp, M062x and  $\omega$ b97xd)

| molecule |            | TD-B3lyp<br>(nm) | TD-M062x<br>(nm) | TD- $\omega$ b97xd<br>(nm) | Experiment<br>(nm) |
|----------|------------|------------------|------------------|----------------------------|--------------------|
| TPMCN    | Absorption | 482              | 341              | 363                        | 360                |
|          | Emission   | 654              | 444              | 487                        | 440                |
| TPBMCN   | Absorption | 461              | 331              | 365                        | 364                |
|          | Emission   | 615              | 406              | 472                        | 415                |

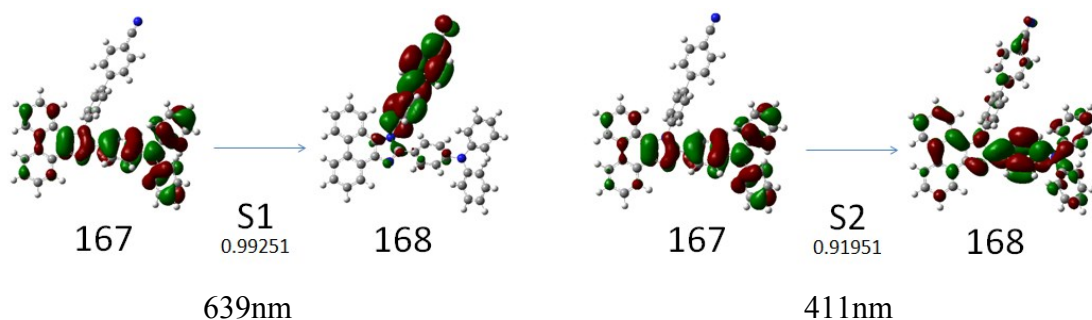

Figure S1 NTOs on S<sub>0</sub>-geometry and calculated emitting wavelengths of S<sub>1</sub> and S<sub>2</sub> states of H<sub>1</sub>V<sub>2</sub> in acetonitrile

## SI-2: Computational methodology

### Solvatochromic effect

The influence of solvent environment on the optical property of our compounds can be understood using the Lippert-Mataga equation, a model that describes the interactions between the solvent and the dipole moment of solute:

$$hc(\nu_a - \nu_f) = hc(\nu_a^0 - \nu_f^0) - \frac{2(\mu_e - \mu_g)^2}{a^3} f(\varepsilon, n)$$

where  $f$  is the orientational polarizability of the solvent,  $\nu_a^0 - \nu_f^0$  corresponds to the Stokes shifts when  $f$  is zero,  $\mu_e$  is the excited state dipole moment,  $\mu_g$  is the ground-state dipole moment;  $a$  is the solvent cavity (Onsager) radius, derived from the Avogadro number ( $N$ ), molecular weight ( $M$ ), and density ( $d=1.0 \text{ g/cm}^3$ );  $\varepsilon$  and  $n$  are the solvent dielectric and the solvent refractive index, respectively;  $f(\varepsilon, n)$  and  $a$  can be calculated respectively as follows:

$$f(\varepsilon, n) = \frac{\varepsilon - 1}{2\varepsilon + 1} - \frac{n^2 - 1}{2n^2 + 1}, \quad a = (3M / 4N\pi d)^{1/3}$$

### Centroids of charge<sup>SI-1</sup>

The points in spaces where an increment or a depletion of the density upon absorption is produced is defined as:

$$\rho_+(r) = \begin{cases} \rho_{EX}(r) - \rho_{GS}(r) & \text{if } \rho_{EX}(r) > \rho_{GS}(r) \\ 0 & \text{if } \rho_{EX}(r) < \rho_{GS}(r) \end{cases} \quad (1)$$

$$\rho_-(r) = \begin{cases} \rho_{EX}(r) - \rho_{GS}(r) & \text{if } \rho_{EX}(r) < \rho_{GS}(r) \\ 0 & \text{if } \rho_{EX}(r) > \rho_{GS}(r) \end{cases}$$

In the equations above,  $\rho_{EX}(r)$ ,  $\rho_{GS}(r)$  are the electronic densities associated to the ground and excited states. Therefore two functions  $(x_+, y_+, z_+)$ ,  $(x_-, y_-, z_-)$ , defining the barycenters of  $\rho_+(r)$  and  $\rho_-(r)$  is defined as:

$$\begin{aligned} (x_+, y_+, z_+) &= \frac{\int r \rho_+(r) dr}{\int \rho_+(r) dr} \\ (x_-, y_-, z_-) &= \frac{\int r \rho_-(r) dr}{\int \rho_-(r) dr} \end{aligned} \quad (2)$$

Also we can get the root-mean-square deviations along the three axes using the equations as below ( $\sigma_{aj}$ ,  $j=x, y, z$ ;  $a=+$  or  $-$ ):

$$\sigma_{a,j} = \sqrt{\frac{\sum_i \rho_a(r_i) (j_i - j_a)^2}{\sum_i \rho_a(r_i)}} \quad (3)$$

According all the equations above, the centroids of charge can be defined as:

$$\begin{aligned} C_+(r) &= A_+ e \left( -\frac{(x-x_+)^2}{2\sigma_{+x}^2} - \frac{(y-y_+)^2}{2\sigma_{+y}^2} - \frac{(z-z_+)^2}{2\sigma_{+z}^2} \right) \\ C_-(r) &= A_- e \left( -\frac{(x-x_-)^2}{2\sigma_{-x}^2} - \frac{(y-y_-)^2}{2\sigma_{-y}^2} - \frac{(z-z_-)^2}{2\sigma_{-z}^2} \right) \end{aligned} \quad (4)$$

In Equation 4,  $A_+$  and  $A_-$  are the normalized factors that ensure the integrated charge on the centroid to be equal to the corresponding density change integrated in the whole space.

### SI-3: Optimized geometry and UV wavelengths

We divide 18 molecules into two groups: cyano-free, which named in lowercase; cyano-substituted, which named in uppercase. All the molecules are named according to the number of benzene on the backbone and the branch. For example,  $h_1v_3$  means cyano-free series, horizontal backbone one benzene ring and vertical branch three benzene rings.

| LE\CT    | 1 phenyl                                                                                                           | 2 phenyl                                                                                                           | 3 phenyl                                                                                                             |
|----------|--------------------------------------------------------------------------------------------------------------------|--------------------------------------------------------------------------------------------------------------------|----------------------------------------------------------------------------------------------------------------------|
| 1 phenyl | <br>h <sub>1</sub> v <sub>1</sub> | <br>h <sub>1</sub> v <sub>2</sub> | <br>h <sub>1</sub> v <sub>3</sub> |
| 2 phenyl | <br>h <sub>2</sub> v <sub>1</sub> | <br>h <sub>2</sub> v <sub>2</sub> | <br>h <sub>2</sub> v <sub>3</sub> |
| 3 phenyl | <br>h <sub>3</sub> v <sub>1</sub> | <br>h <sub>3</sub> v <sub>2</sub> | <br>h <sub>3</sub> v <sub>3</sub> |

(a)

| LE\CT    | 1 phenyl                                                                                                             | 2 phenyl                                                                                                             | 3 phenyl                                                                                                               |
|----------|----------------------------------------------------------------------------------------------------------------------|----------------------------------------------------------------------------------------------------------------------|------------------------------------------------------------------------------------------------------------------------|
| 1 phenyl | <br>H <sub>1</sub> V <sub>1</sub> | <br>H <sub>1</sub> V <sub>2</sub> | <br>H <sub>1</sub> V <sub>3</sub> |
| 2 phenyl | <br>H <sub>2</sub> V <sub>1</sub> | <br>H <sub>2</sub> V <sub>2</sub> | <br>H <sub>2</sub> V <sub>3</sub> |
| 3 phenyl | <br>H <sub>3</sub> V <sub>1</sub> | <br>H <sub>3</sub> V <sub>2</sub> | <br>H <sub>3</sub> V <sub>3</sub> |

(b)

Figure S2. Optimized geometries of (a) cyano-free molecules and (b) cyano-substituted molecules.

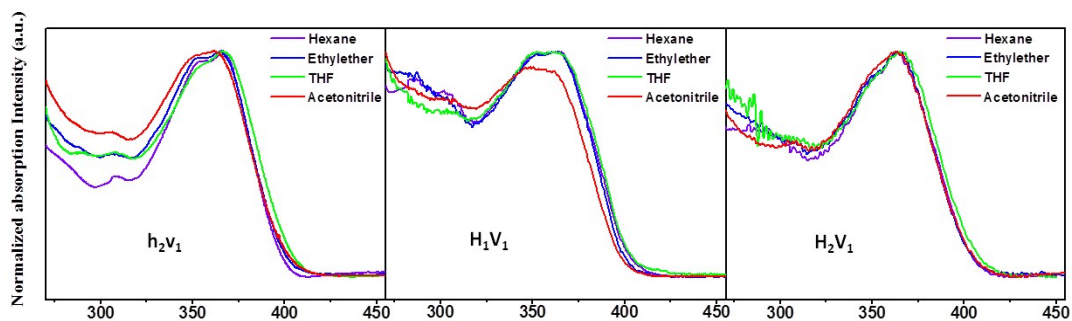

Figure S3. Solvent effect of UV spectra of  $h_2v_1$ ,  $H_1V_1$  and  $H_2V_1$

**SI-4: NTOs and Centroids of charges of S1 and S2 states of cyano-substituent molecules compared with NTOs of S1 of cyano-free molecules and corresponding calculation data.**

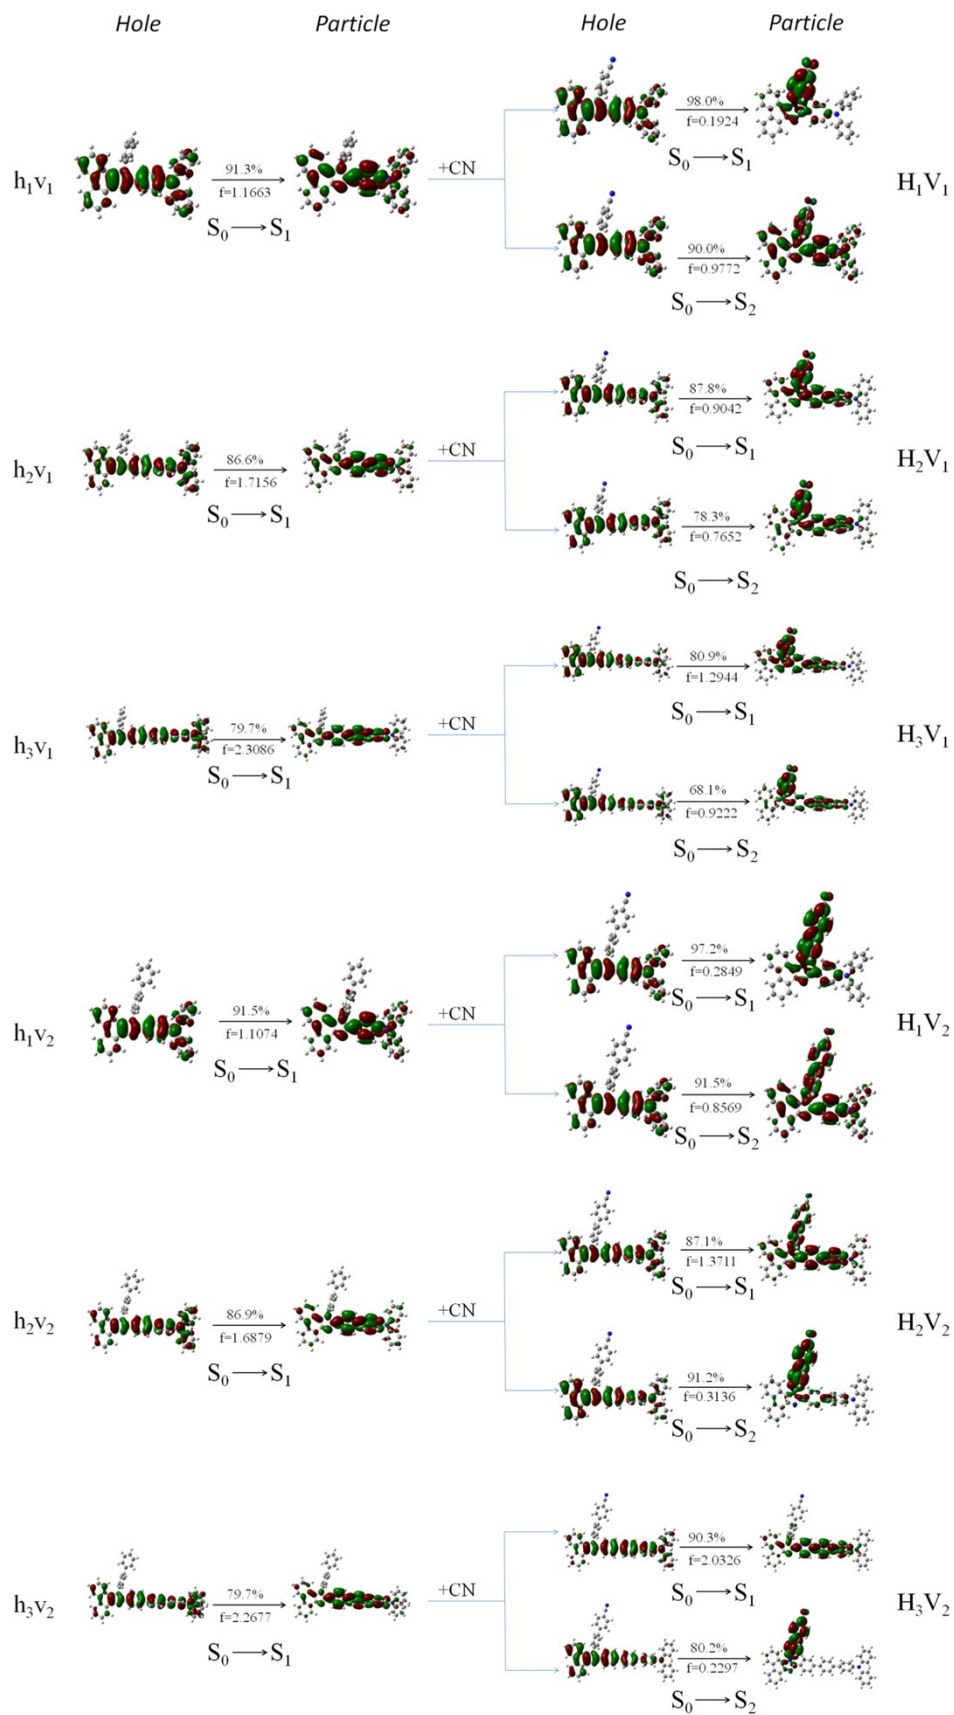

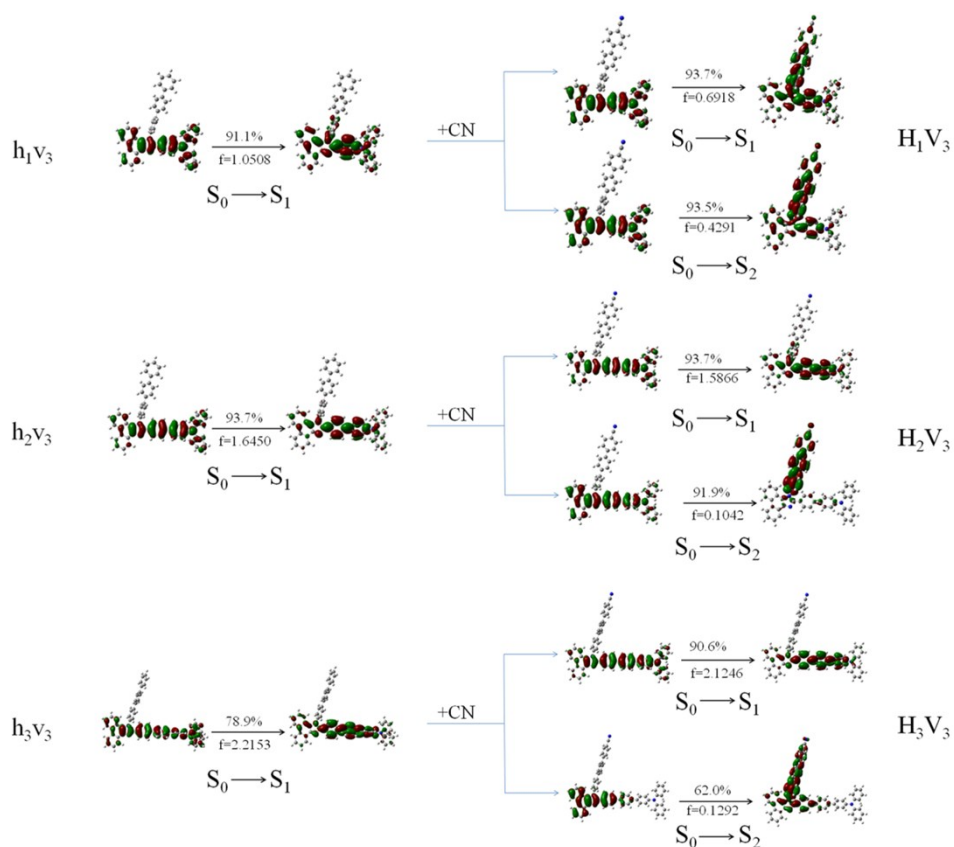

Figure S4. Main transition processes of NTOs of all the 18 molecules on  $S_0$ -geometry following with the oscillator strengths  $f$  (under the arrows) and the transition probabilities (above the arrows). Only  $S_1$  and  $S_2$  states are shown for our interest. From NTO analysis we can see that the  $S_1$  and  $S_2$  states of cyano-substituted molecules have the same wavefunction shapes on main backbone but different phase on the branch except for  $H_2V_2$  and  $H_3V_3$  molecules (phase reversion phenomenon occurs on the main backbone, which we guess is caused by the program calculation), and the sum of oscillator strengths of  $S_1$  and  $S_2$  states of cyano-substituted molecules almost equal to that of  $S_1$  states of corresponding cyano-free molecules.



*Hole-particle distribution*

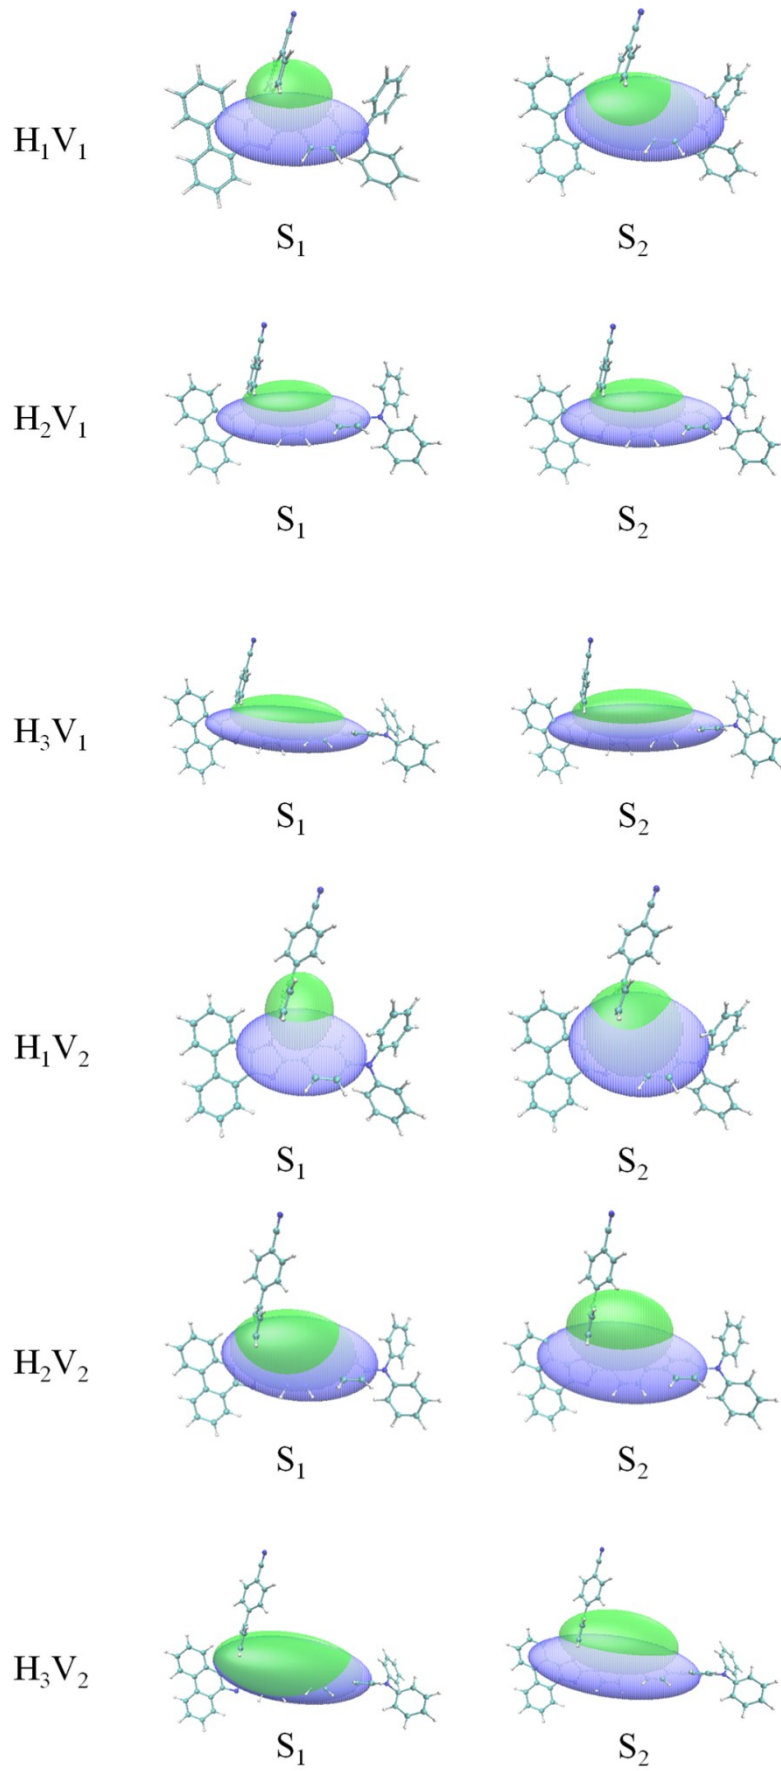

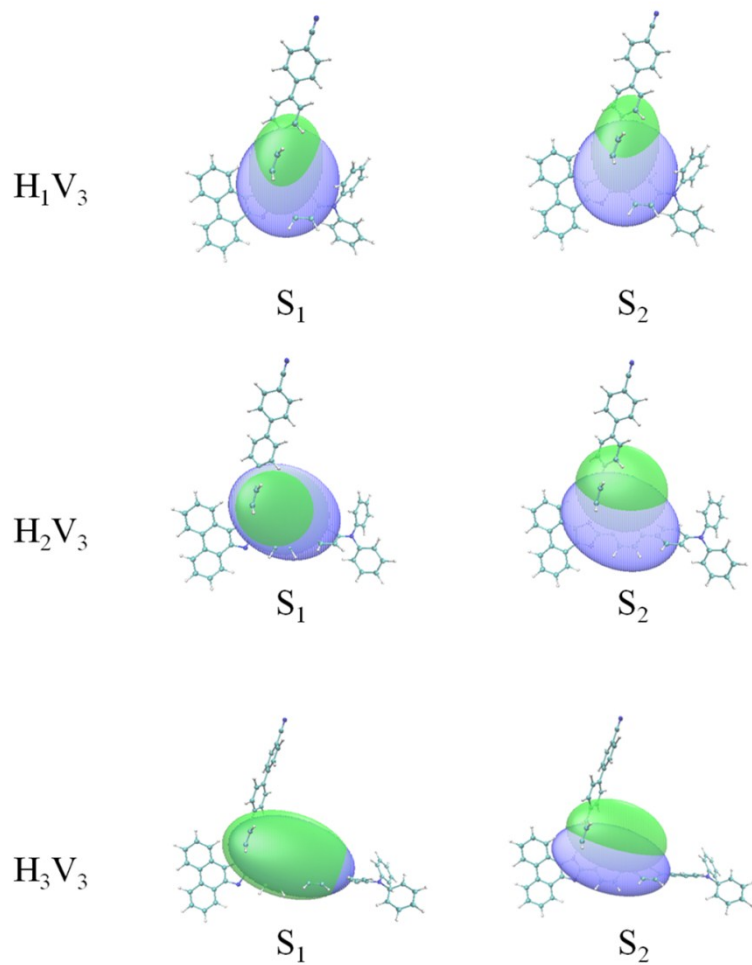

Figure S5. hole-particle distributions of S1 and S2 states of cyano-substituted molecules on S0-geometry. Green areas and blue areas refer to the zones where the electron density is partly increased and decreased respectively.

Table S2. Calculated overlap integral and distance of CT of S1 and S2 states of cyano-substituted molecules on S0-geometry. The smaller overlap integral and larger distance of CT, the more character of CT the state has.

| Molecule structure                                                                  | Lable                         | Excited state  | Overlap integral | Distance of CT(Å) |
|-------------------------------------------------------------------------------------|-------------------------------|----------------|------------------|-------------------|
| 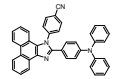   | H <sub>1</sub> V <sub>1</sub> | S <sub>1</sub> | 0.869            | 2.233             |
|                                                                                     |                               | S <sub>2</sub> | 0.979            | 0.808             |
|    | H <sub>2</sub> V <sub>1</sub> | S <sub>1</sub> | 0.947            | 1.299             |
|                                                                                     |                               | S <sub>2</sub> | 0.938            | 1.379             |
|    | H <sub>3</sub> V <sub>1</sub> | S <sub>1</sub> | 0.958            | 1.053             |
|                                                                                     |                               | S <sub>2</sub> | 0.940            | 1.279             |
|    | H <sub>1</sub> V <sub>2</sub> | S <sub>1</sub> | 0.886            | 2.739             |
|                                                                                     |                               | S <sub>2</sub> | 0.972            | 1.145             |
|    | H <sub>2</sub> V <sub>2</sub> | S <sub>1</sub> | 0.985            | 0.892             |
|                                                                                     |                               | S <sub>2</sub> | 0.896            | 2.642             |
|    | H <sub>3</sub> V <sub>2</sub> | S <sub>1</sub> | 0.997            | 0.546             |
|                                                                                     |                               | S <sub>2</sub> | 0.903            | 2.486             |
|  | H <sub>1</sub> V <sub>3</sub> | S <sub>1</sub> | 0.963            | 1.634             |
|                                                                                     |                               | S <sub>2</sub> | 0.934            | 2.593             |
|  | H <sub>2</sub> V <sub>3</sub> | S <sub>1</sub> | 0.990            | 0.531             |
|                                                                                     |                               | S <sub>2</sub> | 0.927            | 3.209             |
|  | H <sub>3</sub> V <sub>3</sub> | S <sub>1</sub> | 0.998            | 0.465             |
|                                                                                     |                               | S <sub>2</sub> | 0.947            | 2.677             |

### SI-5: The excitation energy diagram of S1-S5 states

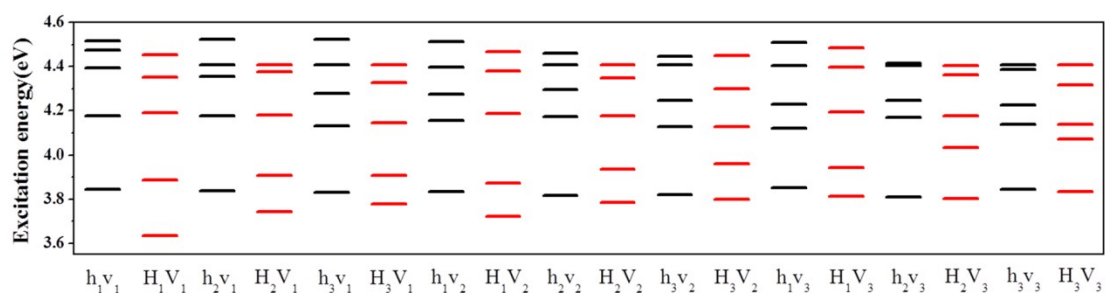

Figure S6. Excitation energies of first five singlet states of all the 18 molecules on S0-geometry. Dark lines and red lines represent the cyano-free and cyano-substituent molecules respectively.

**SI-6: Transition density matrix color-filled map of S1 and S2 states of cyano-substituted molecules and corresponding calculation data.**

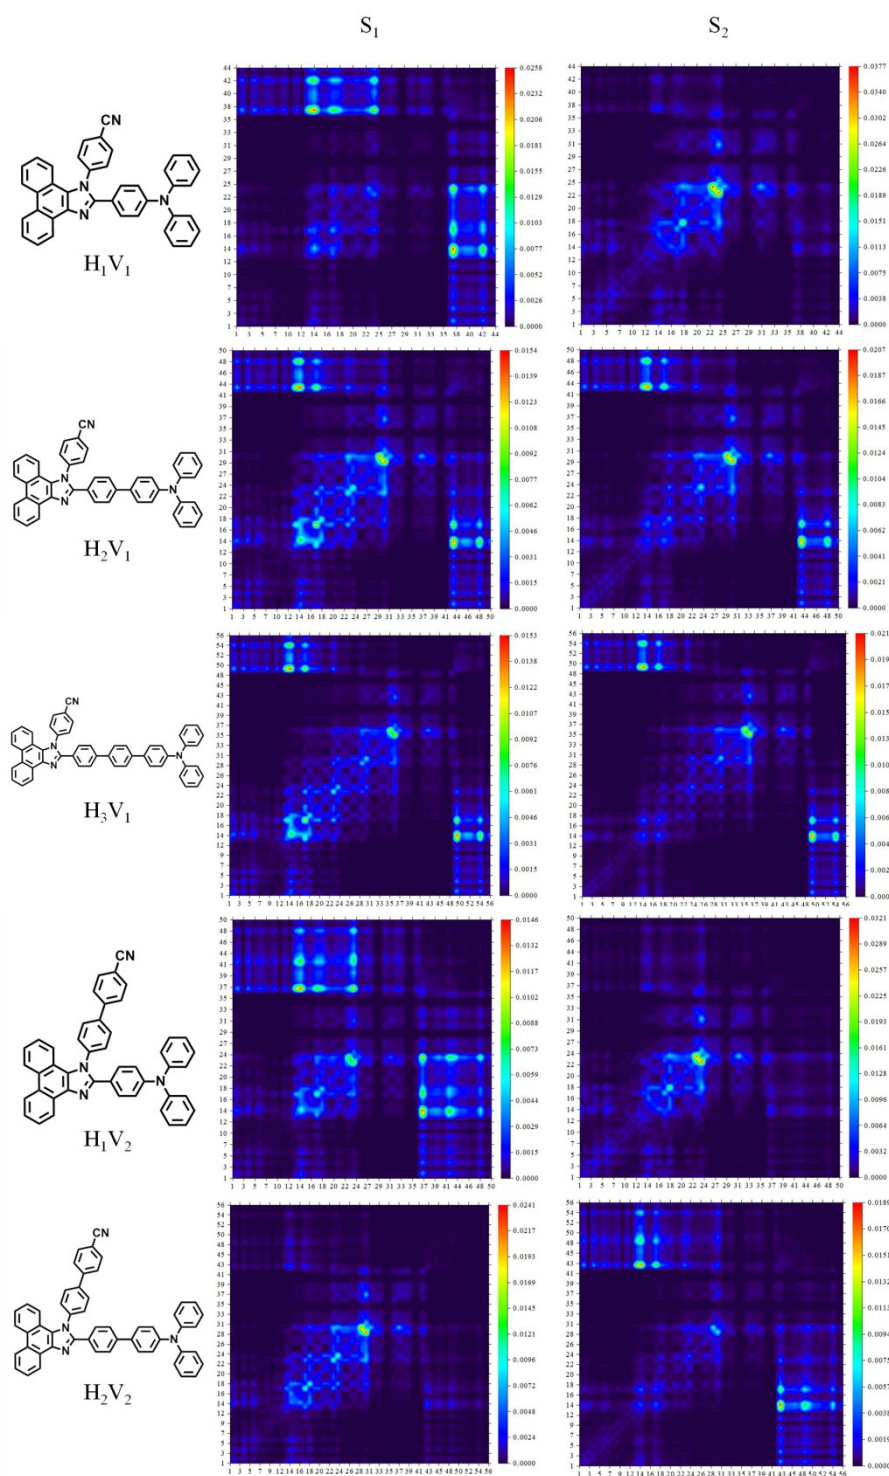

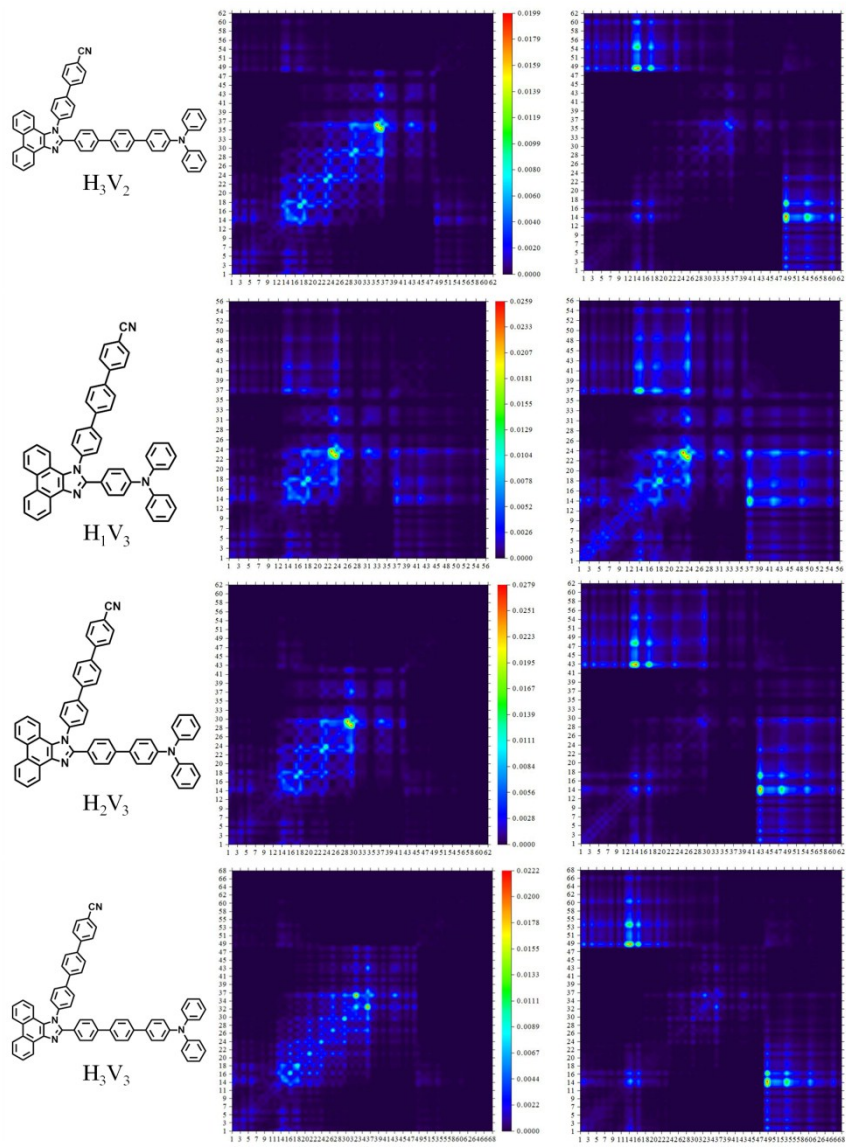

(a)

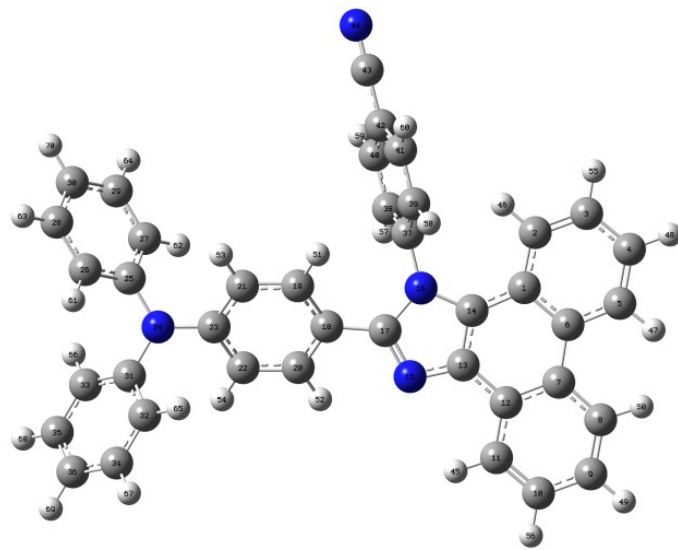

(b)



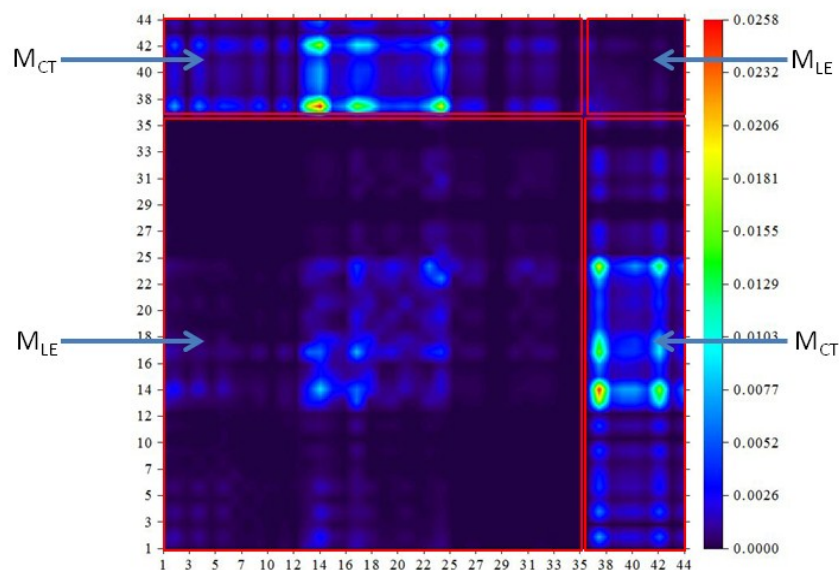

(c)

Figure S7. transition density matrix color-filled map (a) of S1 and S2 states of cyano-substituted molecules on S0-geometry. Labels in abscissa and ordinate correspond to indices of heavy atoms, for clarity, the correspondence between labels and atoms is marked on the plot (b) by taking H<sub>1</sub>V<sub>1</sub> molecules as an example. We order the atoms by labeling the main backbone first and then the branch. Since hydrogen atoms usually have little contribution to the transitions we are interested in, they are usually ignored by default. According to this, we divide the transition density matrix color-filled map into LE and CT areas (c), and evaluate the contents of them by using the equations below:

$$R_{LE} = \frac{M_{LE}}{M_{LE} + M_{CT}}$$

$$R_{CT} = \frac{M_{CT}}{M_{LE} + M_{CT}}$$

In equations,  $R_{LE}$ ,  $R_{CT}$  represent the ratios of LE and CT in states,  $M_{LE}$ ,  $M_{CT}$  represent the sum of the matrix elements in LE and CT areas respectively.

Table S3. Contents of LE and CT of S<sub>1</sub> and S<sub>2</sub> states of cyano-substituted molecules on S0-geometry by using the equations above.

|     | H <sub>1</sub> V <sub>1</sub> |                | H <sub>2</sub> V <sub>1</sub> |                | H <sub>3</sub> V <sub>1</sub> |                | H <sub>1</sub> V <sub>2</sub> |                | H <sub>2</sub> V <sub>2</sub> |                | H <sub>3</sub> V <sub>2</sub> |                | H <sub>1</sub> V <sub>3</sub> |                | H <sub>2</sub> V <sub>3</sub> |                | H <sub>3</sub> V <sub>3</sub> |                |
|-----|-------------------------------|----------------|-------------------------------|----------------|-------------------------------|----------------|-------------------------------|----------------|-------------------------------|----------------|-------------------------------|----------------|-------------------------------|----------------|-------------------------------|----------------|-------------------------------|----------------|
|     | S <sub>1</sub>                | S <sub>2</sub> |
| LE% | 28.7                          | 86.7           | 61.8                          | 58.5           | 64.8                          | 57.0           | 33.8                          | 78.8           | 84.0                          | 30.8           | 91.0                          | 26.4           | 66.6                          | 47.4           | 94.9                          | 18.8           | 95.9                          | 26.9           |
| CT% | 71.3                          | 13.3           | 38.2                          | 41.5           | 35.2                          | 43.0           | 66.2                          | 21.2           | 16.0                          | 69.2           | 9.0                           | 73.6           | 33.4                          | 52.6           | 5.1                           | 81.2           | 4.1                           | 73.1           |

[SI-1] Le Bahers T, Adamo C, Ciofini I. *Journal of Chemical Theory and Computation*, **2011**, 7(8): 2498-2506.
